# Supplementary material for: InFusion: Advancing Discovery of Fusion Genes and Chimeric Transcripts from Deep RNA-Sequencing Data
Source: PLoS One. 2016 Dec 1;11(12):e0167417. doi: 10.1371/journal.pone.0167417 (PMC5132003; doi:10.1371/journal.pone.0167417)
Supplement: S4 Table — Showing whether validated fusions were detected by selected tools. (XLSX) [file pone.0167417.s011.xlsx]

## Sheet: Supp. Table 4
Sample	Fusion gene	InFusion	deFuse	ChimeraScan	TopHat-Fusion	SOAPFuse	FusionCatcher
LNCAP	DLEU2-PSPC1	yes	no	yes	no	yes	no
LNCAP	RERE-PIK3CD	yes	yes	yes	yes	yes	yes
LNCAP	MIPOL1-DGKB	yes	yes	yes	yes	yes	yes
LNCAP	MRPS10-HPR	yes	no	yes	no	yes	no
LNCAP	C19orf25-APC2	no	no	no	no	no	no
LNCAP	SLC45A3-ELK4	yes	yes	yes	no	no	yes
LNCAP	TFDP1-GRK1	yes	yes	yes	no	yes	no
LNCAP	FAM117B-BMPR2	yes	yes	yes	yes	yes	yes
LNCAP	GPS2-MPP2	yes	yes	yes	no	yes	no
LNCAP	ITPKC-PPFIA3	yes	yes	no	yes	yes	yes
LNCAP	CCDC43-YBX2	yes	yes	yes	no	no	no
LTL313H	SLC6A17-CA2	no	no	no	no	no	no
LTL313H	PACS1-PTEN	yes	yes	yes	yes	yes	no
LTL313H	TMPRSS2-ERG	yes	yes	yes	yes	yes	yes
LTL313H	SSR1-RNF165	yes	yes	no	yes	no	no
LTL313H	SLC35B1-PEMT	yes	yes	yes	yes	yes	yes
LTL313H	USP34-C2orf74	no	no	no	no	no	no
LTL313H	TRAPPC9-SPRYD3	yes	no	no	no	no	no
LTL313H	TENC1-TTLL9	yes	yes	no	no	no	no
LTL313H	KIAA1467-TTLL9	yes	no	yes	no	no	no
LTL313H	TTLL9-C12orf59	yes	no	no	no	no	no
LTL313H	CA2-RUNX1T1	no	no	no	no	no	no
LTL313H	PDRG1-ARF3	no	no	no	yes	no	no
LTL313H	PDRG1-RUNX1T1	yes	yes	no	yes	no	no
LTL313H	EEF1D-SDC4	yes	no	yes	yes	yes	yes
LTL313H	SPRYD3-PTDSS1	yes	yes	yes	no	yes	yes
