# Supplementary material for: InFusion: Advancing Discovery of Fusion Genes and Chimeric Transcripts from Deep RNA-Sequencing Data
Source: PLoS One. 2016 Dec 1;11(12):e0167417. doi: 10.1371/journal.pone.0167417 (PMC5132003; doi:10.1371/journal.pone.0167417)
Supplement: S5 Table — Total is the total number of fusions detected. Exon boundary break is the number of fusions where both 5' and 3' fusion breaks are on the exon boundary. With isoforms is the number of fusions of the same type that have several isoforms. Break inside exon is the number of fusions where one or both breaks are inside an exon. Break inside intron is the number of fusions where one or both breaks are inside an intron. Within intergenic is the number of fusions where one of the breaks is inside an intergenic region. (XLSX) [file pone.0167417.s012.xlsx]

## Sheet: Supp. Table 5
Fusion type	VCaP200	VCaP500	LNCaP200	LNCaP500
Exon boundary break	36	6	31	4
With isoforms	10	1	1	1
Break inside exon	122	125	113	64
Break inside intron	84	8	99	4
Intergenic Break	94	12	95	15
Total	336	151	338	87
